# Supplementary material for: Tuning the metal-support interaction in the thermal-resistant Au–CeO2 catalysts for CO oxidation: influence of a mild N2 pretreatment
Source: Royal Society of Chemistry journal article supplement (doi:10.1039/c8ra07278g), 2018-01-01
Supplement: c8ra07278g1.pdf [file c8ra07278g1.pdf]

## Supporting Information

### **Tuning the metal-support interaction in the thermal-resistant Au-CeO<sub>2</sub> catalysts for CO oxidation: influence of one mild N<sub>2</sub> pretreatment**

Yuqi Sun <sup>a</sup>, Wei Liu <sup>\*a</sup>, Miao Tian <sup>a</sup>, Ligu Wang <sup>a</sup>, Zhongpeng Wang <sup>\*a</sup>

<sup>a</sup>School of Water Conservancy and Environment, University of Jinan, Jinan  
250022, China.

*\*Corresponding to: [stu\\_liuw@ujn.edu.cn](mailto:stu_liuw@ujn.edu.cn) (Wei Liu); [chm\\_wangzp@ujn.edu.cn](mailto:chm_wangzp@ujn.edu.cn)  
(Zhongpeng Wang).*

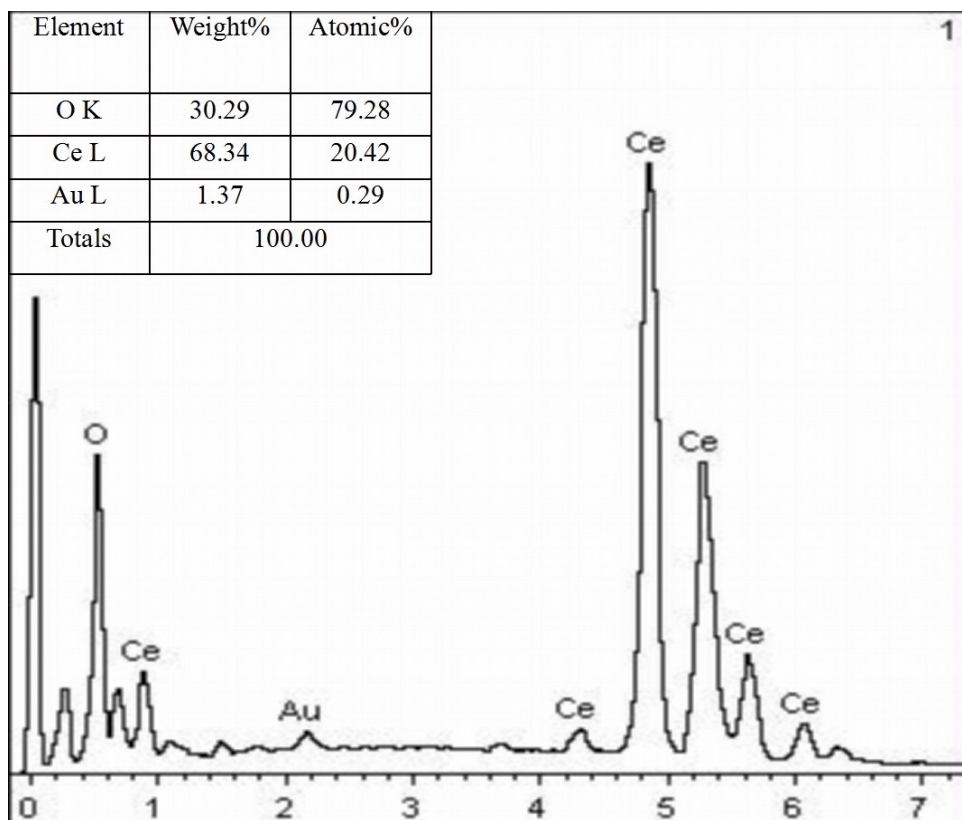

**Fig. S1** EDS spectrum of AC600 samples.

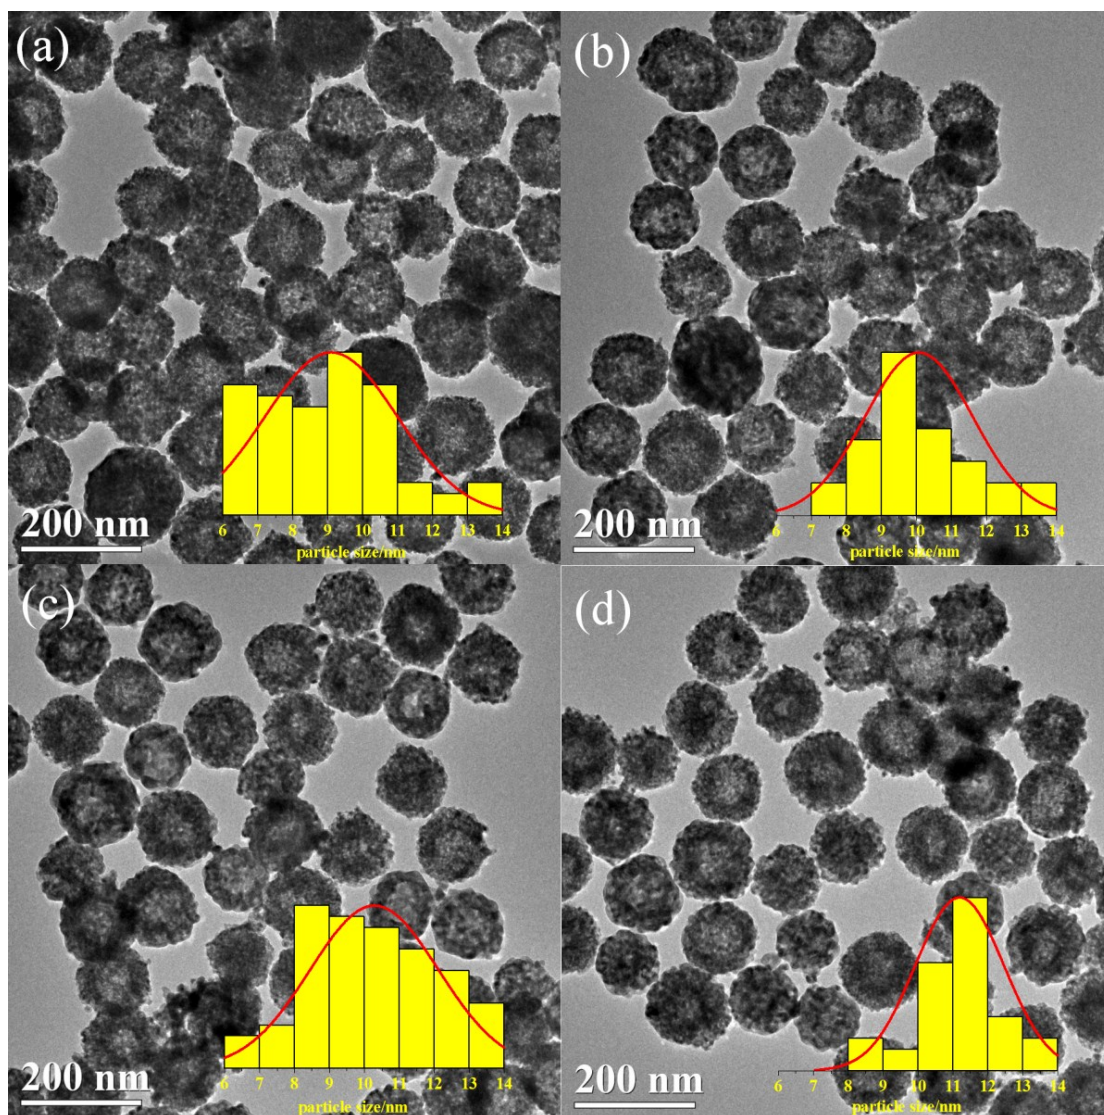

**Fig. S2** TEM images and the corresponding size distribution of the different samples Au NPs. (a) AC600; (b) AC600-O; (c) AC600-N; (d) AC600-H.

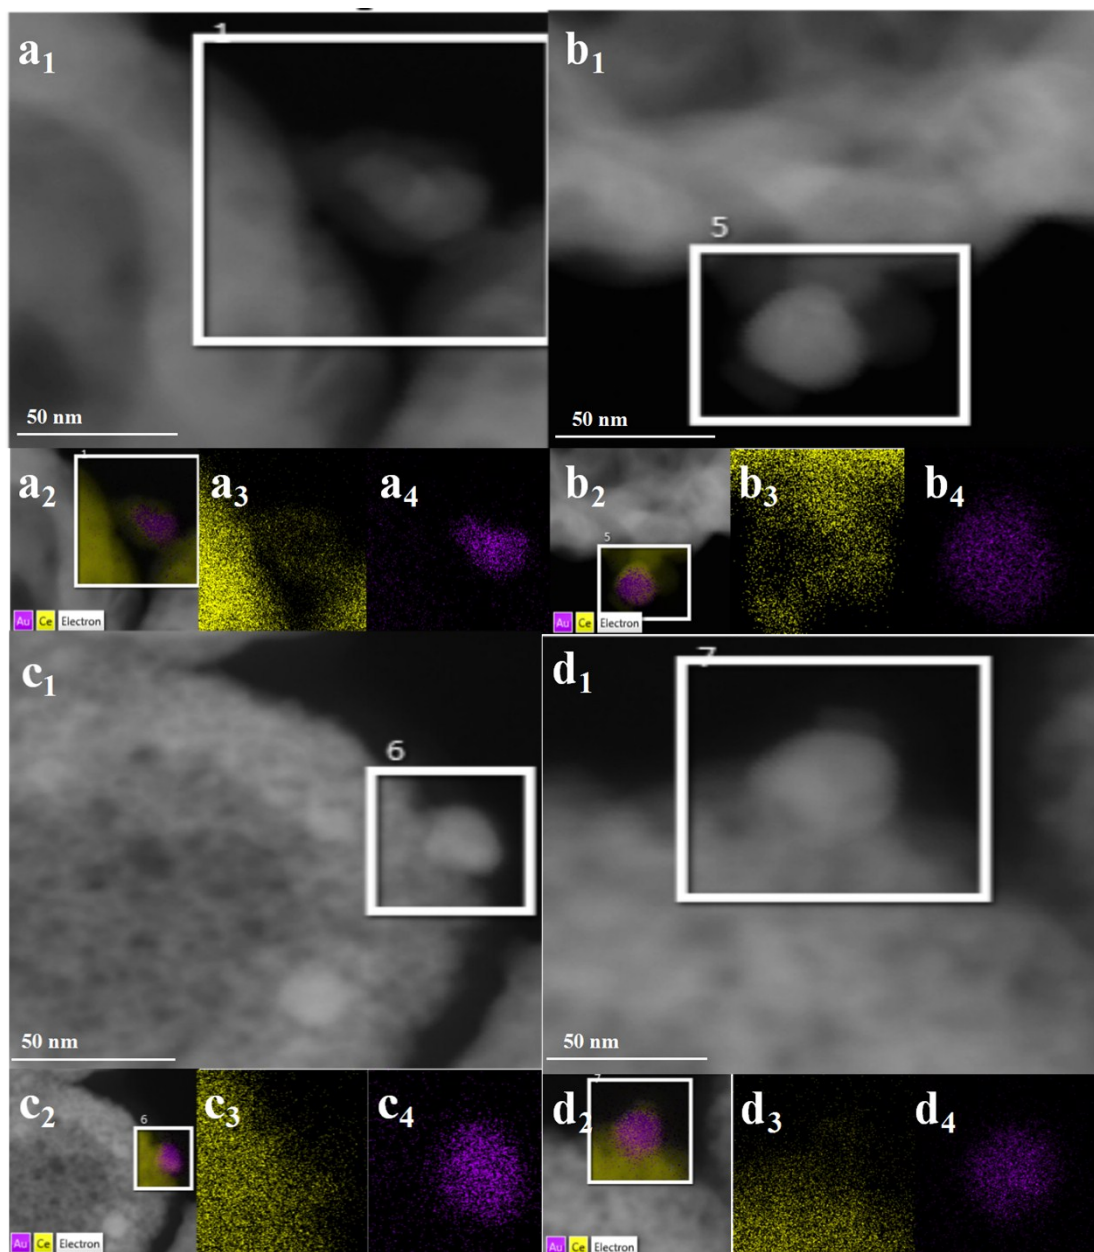

**Fig. S3** STEM ( $x_1$ ) and element mapping results ( $x_2$ ,  $x_3$ , and  $x_4$ ) of the AC600, AC600-O, AC600-N and AC600-H samples ( $x=a, b, c$  and  $d$  for AC600, AC600-O, AC600-N and AC600-H).

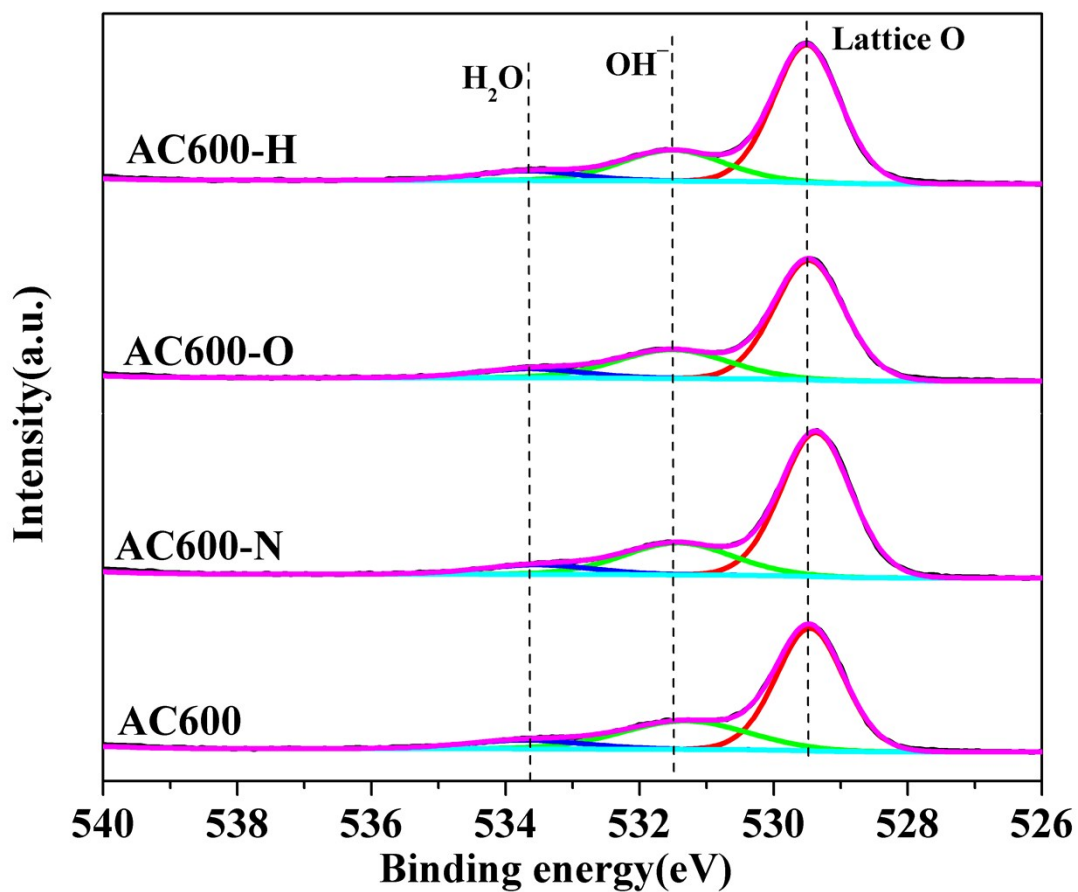

Fig. S4 XPS O1s spectra of AC600, AC600-N, AC600-O and AC600-H catalysts.

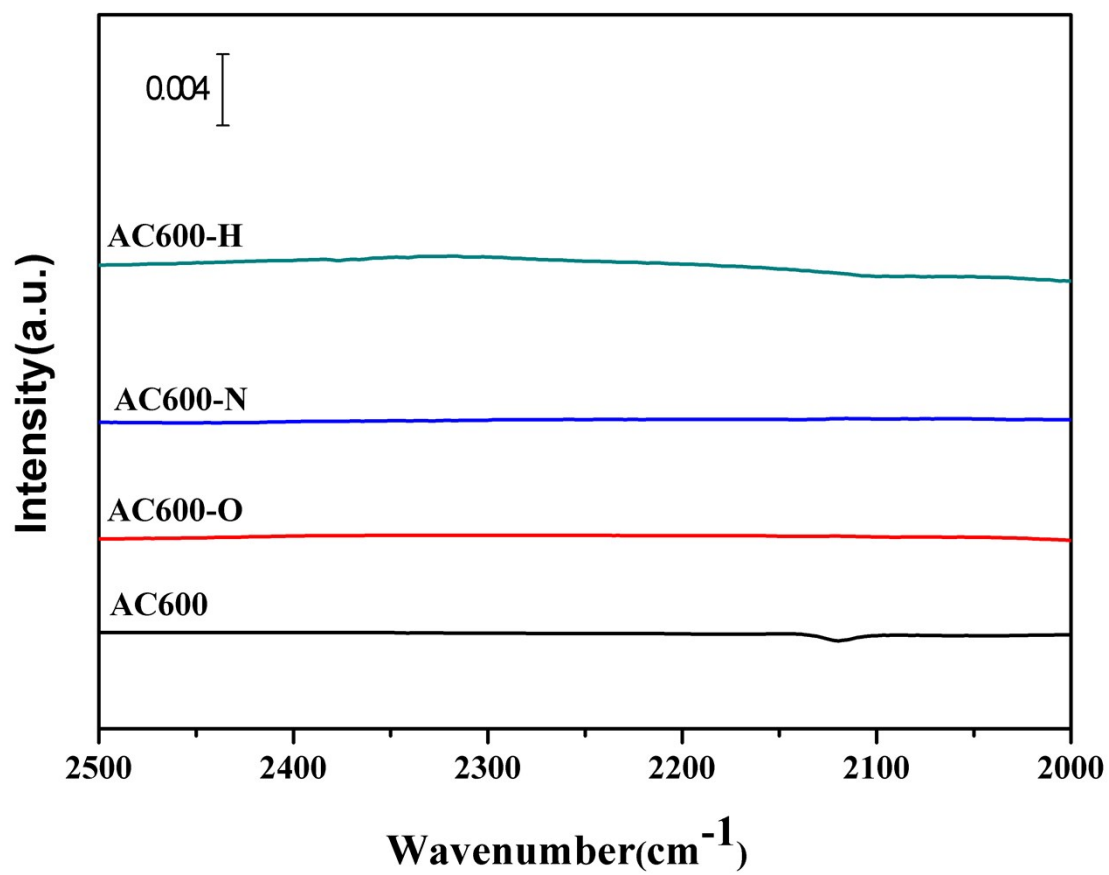

**Fig. S5** The in situ DRIFT spectra of CO adsorption on AC600, AC600-O, AC600-N and AC600-H under the purge of He at room temperature.

**Table S1**  $T_{50}$  and  $T_{100}$  for Au-CeO<sub>2</sub> pretreated in different atmospheres.

| Samples | 600°C    |           |
|---------|----------|-----------|
|         | $T_{50}$ | $T_{100}$ |
| AC600   | 74       | 192       |
| AC600-O | 43       | 110       |
| AC600-N | 37       | 94        |
| AC600-H | 38       | 128       |

**Table S2** Structural parameters of Au nanoparticles on various samples.

| Samples | Average Au nanoparticle diameter (nm) | Percentage of surface Au atoms (%) <sup>a</sup> |
|---------|---------------------------------------|-------------------------------------------------|
| AC600   | 9.1                                   | 14.6                                            |
| AC600-O | 10.1                                  | 13.1                                            |
| AC600-N | 10.3                                  | 12.9                                            |
| AC600-H | 11.2                                  | 11.9                                            |

<sup>a</sup>Calculated from the average Au nanoparticle diameters following the equation:

$$\text{Au dispersion} = (1.33/\text{Average nanoparticle diameter}) * 100\%.$$



**Table S3** Relative content of Au species for different catalysts obtained from

Au4f XPS spectra.

| Samples | Au <sup>0</sup> |         |              | Au <sup>δ+</sup> |         |              |
|---------|-----------------|---------|--------------|------------------|---------|--------------|
|         | Peaks<br>(eV)   | content | FWHM<br>(eV) | peaks            | content | FWHM<br>(eV) |
| AC600   | 84.3            | 50.7%   | 0.78         | 84.6             | 49.3%   | 2.06         |
|         | 87.8            |         |              | 88.4             |         |              |
| AC600-O | 84.3            | 51.8%   | 0.82         | 84.5             | 48.2%   | 1.90         |
|         | 87.8            |         |              | 88.5             |         |              |
| AC600-N | 84.4            | 71.3%   | 0.95         | 84.8             | 28.7%   | 2.32         |
|         | 88.1            |         |              | 88.4             |         |              |
| AC600-H | 84.2            | 76.2%   | 0.93         | 84.5             | 23.8%   | 2.02         |
|         | 87.9            |         |              | 88.4             |         |              |



**Table S4** Relative content of Ce species for different catalysts obtained from Ce3d XPS spectra.

| Catalysts | Ce <sup>3+</sup> |            | Ce <sup>4+</sup>                               |            |
|-----------|------------------|------------|------------------------------------------------|------------|
|           | peaks            | Content(%) | peaks                                          | content(%) |
| AC600     | 885.1<br>902.5   | 18.4%      | 882.4, 889.1,<br>898.3, 900.8,<br>916.6, 907.4 | 81.6%      |
| AC600-O   | 885.1<br>902.5   | 17.7%      | 882.4, 889.1,<br>898.3, 900.8,<br>916.6, 907.4 | 82.3%      |
| AC600-N   | 885.2<br>902.5   | 18.0%      | 882.4, 889.1,<br>898.3, 900.8,<br>916.6, 907.4 | 82.0%      |
| AC600-H   | 885.3<br>902.5   | 18.0%      | 882.4, 889.1,<br>898.3, 900.8,<br>916.6, 907.4 | 82.0%      |

**Table S5** Relative content of oxygen species for different catalysts obtained

from O1s XPS spectra.

| Samples | lattice O |            | OH <sup>-</sup> |            | H <sub>2</sub> O |            |
|---------|-----------|------------|-----------------|------------|------------------|------------|
|         | B.E. (eV) | Content(%) | B.E. (eV)       | Content(%) | B.E. (eV)        | Content(%) |
| AC600   | 529.5     | 64         | 531.3           | 28         | 533.7            | 8          |
| AC600-O | 529.5     | 67         | 531.5           | 26         | 533.6            | 7          |
| AC600-N | 529.4     | 69         | 531.4           | 24         | 533.5            | 7          |
| AC600-H | 529.5     | 69         | 531.5           | 24         | 533.7            | 7          |
